# Supplementary material
Source: HighWire-hosted journal article supplement (https://jnm.snmjournals.org/highwire/filestream/109590/field_highwire_adjunct_files/1/263895_Supplemental_Data.pdf)
Supplement: 263895_Supplemental_Data.pdf [file 263895_Supplemental_Data.pdf]

**Supplemental Table 1. Nanoparticle imaging agents used in the clinic and clinical trials.** Overview of nanoparticles routinely used or in clinical trials for diagnostic and theranostic applications. Also therapeutic nanoparticles with intrinsic imaging properties are included. The order is based on year of approval or year of entering clinical trials. For the complete list of clinical trials and NCT numbers, please see Table S2.

| Name                                                               | Trade Name                              | NP type                                | Application                                                                          | Approval / Clinical trial *                   |
|--------------------------------------------------------------------|-----------------------------------------|----------------------------------------|--------------------------------------------------------------------------------------|-----------------------------------------------|
| Technetium 99m Sulfur Colloid Injection (Mallinckrodt)             | TechneColl                              | Technetium-99m sulfur colloid          | Diagnosis:<br>Localization of sentinel lymph nodes                                   | FDA (1974)<br>Currently discontinued          |
| Technetium 99m Sulfur Colloid Injection (Pharmalucene)             | AN-Sulfur Colloid                       | Technetium-99m sulfur colloid          | Diagnosis:<br>Localization of sentinel lymph nodes                                   | FDA (1978)                                    |
| Iron Dextran (Pharmacosmos)                                        | CosmoFer / Ferrisat (EU)<br>INFeD (USA) | Iron oxide NP                          | Therapy:<br>Treatment of iron deficiency                                             | FDA (1992)<br>Some countries in Europe (2001) |
| Technetium 99m Rhenium Sulfide Nanocolloid (CIS Bio International) | Nanocis                                 | Technetium-99m rhenium sulfide colloid | Diagnosis:<br>Lymphoscintigraphy and sentinel lymph node localization                | Some countries in Europe (1993)               |
| Technetium 99m Albumin Nanocolloid (GE Healthcare)                 | Nanocoll                                | Technetium-99m albumin colloid         | Diagnosis:<br>Lymphoscintigraphy and sentinel lymph node localization                | Denmark (1995)<br>Currently discontinued      |
| Iron Dextran (American Reagent)                                    | DexFerrum (USA)<br>DexIron (Canada)     | Iron oxide NP                          | Therapy:<br>Treatment of iron deficiency                                             | FDA (1996)                                    |
| Ferumoxide (AMAG Pharmaceuticals)                                  | Feridex                                 | Iron oxide NP                          | Diagnosis:<br>Imaging liver lesions                                                  | FDA (1996)<br>Discontinued (2008)             |
| Ferric Gluconate (Sanofi)                                          | Ferrlecit                               | Iron oxide NP                          | Therapy:<br>Treatment of iron deficiency in patients with chronic kidney dysfunction | FDA (1999)                                    |
| Technetium 99m Albumin Nanocolloid (Medi-Radiopharma)              | Senti-Scint                             | Technetium-99m albumin colloid         | Diagnosis:<br>Lymphoscintigraphy and sentinel lymph node localization                | Some countries in Europe (1999)               |
| Iron Sucrose (American Reagent)                                    | Venofer                                 | Iron oxide NP                          | Therapy:<br>Treatment of iron deficiency in patients with chronic kidney dysfunction | FDA (2000)                                    |
| Ferucarbotran or Ferrixan (Bayer Schering Pharma AG)               | Resovist                                | Iron oxide NP                          | Diagnosis:<br>Imaging liver lesions                                                  | EMA (2001)<br>Discontinued (2009)             |
| Technetium 99m Tin Fluoride Nanocolloid (Gipharma)                 | Hepatate                                | Technetium-99m tin fluoride colloid    | Diagnosis:<br>Lymphoscintigraphy and sentinel lymph node localization                | France (2002)                                 |
| Ferumoxytol (AMAG & Takeda)                                        | Feraheme<br>Rienso                      | Iron oxide NP                          | Therapy:<br>Treatment of iron deficiency in patients with chronic kidney dysfunction | FDA (2009)                                    |

|                                                       |                                                      |                                                                                       |                                                                                                                |                                    |
|-------------------------------------------------------|------------------------------------------------------|---------------------------------------------------------------------------------------|----------------------------------------------------------------------------------------------------------------|------------------------------------|
| 10% Iron Isomaltoside (Pharmacosmos)                  | Monofer                                              | Iron oxide NP                                                                         | Therapy:<br>Treatment of iron deficiency                                                                       | Several countries in Europe (2009) |
| SPION (Magforce)                                      | Nanotherm                                            | Iron oxide NP                                                                         | Theranostics:<br>Magnetic thermal ablation of glioblastoma                                                     | EMA (2011)                         |
| Technetium 99m Albumin Nanocolloid (ROTOP Pharmaka)   | Nanotop                                              | Technetium-99m albumin colloid                                                        | Diagnosis:<br>Lymphoscintigraphy and sentinel lymph node localization                                          | Germany (2011)<br>EMA (2014)       |
| Technetium 99m Albumin Nanocolloid (Medi-Radiopharma) | Nanoscan Nanoalbumon (Italy)<br>Nanoscient (Belgium) | Technetium-99m albumin colloid                                                        | Diagnosis:<br>Bone marrow and inflammation scanning<br>Lymphoscintigraphy and sentinel lymph node localization | Denmark (2011)                     |
| Ferric Carboxymaltose (Vifor Pharma)                  | Ferinject (EU)<br>Injectafer (USA)                   | Iron oxide NP                                                                         | Therapy:<br>Treatment of iron deficiency                                                                       | FDA (2013)                         |
| 5% Iron Isomaltoside (Pharmacosmos)                   | Diafer                                               | Iron oxide NP                                                                         | Therapy:<br>Treatment of iron deficiency                                                                       | Several countries in Europe (2013) |
| Ferumoxtran-10 (AMAG Pharmaceuticals)                 | Sinerem (EU)<br>Combidx (US)                         | Iron oxide NP                                                                         | Diagnosis:<br>Imaging lymph node metastases                                                                    | The Netherlands (2013)             |
| SPION (Mammotome)                                     | Magtrace                                             | Iron oxide NP                                                                         | Diagnosis:<br>Imaging lymph node metastases                                                                    | FDA 2018                           |
| NBTXR3 (Nanobiotix)                                   | Hensify                                              | Hafnium oxide NP                                                                      | Therapy:<br>Radiosensitizers for external-beam radiotherapy of multiple cancers                                | EMA (2019)                         |
| <sup>64</sup> Cu-MM-302                               |                                                      | HER2-targeted liposome radiolabeled with <sup>64</sup> Cu and loaded with doxorubicin | Theranostics:<br>Treatment and imaging of advanced HER2+ cancer with brain metastases                          | Phase I (2017)                     |
| NU-0129                                               |                                                      | Gold NP conjugated with nucleic acids                                                 | Therapy:<br>Treatment of recurrent glioblastoma or gliosarcoma undergoing surgery                              | Phase I (2020)                     |
| <sup>89</sup> Zr-CPC634                               |                                                      | Polymeric NP radiolabeled with <sup>89</sup> Zr and loaded with docetaxel             | Theranostics:<br>Treatment and imaging of ovarian cancer                                                       | Phase II (2020)                    |
| AuroShell                                             |                                                      | NP made of silica core and gold shell                                                 | Therapy:<br>Photothermal ablation of different types of cancer                                                 | No phase (2021)                    |
| <sup>64</sup> Cu-Macrin                               |                                                      | <sup>64</sup> Cu-labelled polyglucose NP                                              | Diagnosis:<br>PET imaging of macrophage at disease sites                                                       | Phase I (2021)                     |
| Radiolabeled Cornell dots                             |                                                      | RGD-targeted silica NP radiolabeled with <sup>124</sup> I or                          | Diagnosis:<br>Imaging of various cancers                                                                       | Phase I (2022)                     |

|                                                                                                       |  |                                                                                             |                                                         |                   |
|-------------------------------------------------------------------------------------------------------|--|---------------------------------------------------------------------------------------------|---------------------------------------------------------|-------------------|
|                                                                                                       |  | <sup>89</sup> Zr (in addition to NIR fluorophore)                                           |                                                         |                   |
| Radiolabeled Cornell dots                                                                             |  | PSMA-targeted silica NP radiolabeled with <sup>64</sup> Cu (in addition to NIR fluorophore) | Diagnosis:<br>Imaging of prostate cancer                | Phase I (2022)    |
| Cornell dots                                                                                          |  | RGD-targeted silica NP labeled with near-infrared fluorophore                               | Diagnosis:<br>Imaging of melanoma in head and neck area | Phase I/II (2022) |
| AGuIX                                                                                                 |  | Polysiloxane core matrix bound to gadolinium chelate                                        | Theranostics:<br>Theranostics against various cancers   | Phase II (2022)   |
| ONM-100                                                                                               |  | pH-sensitive micelle encapsulating a fluorophore                                            | Theranostics:<br>Intraoperative fluorescence imaging    | Phase II (2022)   |
| * Year next to the clinical phase refers to the last time the clinical trial information was updated. |  |                                                                                             |                                                         |                   |

**Supplemental Table 2.** Details of the clinical trials in which nanoparticle diagnostics and theranostics are investigated.

| Name                    | NP type                                                                               | Application                                                                   | Clinical trial*                                                                                                                                                                                                                                                                                                                                                                                                                                                                                                                                                                                                                                                                                   |
|-------------------------|---------------------------------------------------------------------------------------|-------------------------------------------------------------------------------|---------------------------------------------------------------------------------------------------------------------------------------------------------------------------------------------------------------------------------------------------------------------------------------------------------------------------------------------------------------------------------------------------------------------------------------------------------------------------------------------------------------------------------------------------------------------------------------------------------------------------------------------------------------------------------------------------|
| <sup>64</sup> Cu-MM-302 | HER2-targeted liposome radiolabeled with <sup>64</sup> Cu and loaded with doxorubicin | Treatment and imaging of advanced HER2+ cancer with brain metastases          | NCT01304797, Phase I, Active (2011)<br>NCT02735798, Phase I, Discontinued (2017)                                                                                                                                                                                                                                                                                                                                                                                                                                                                                                                                                                                                                  |
| AuroShell               | NP made of silica core and gold shell                                                 | Thermal ablation of different types of cancer                                 | NCT01679470, Terminated (2016)<br>NCT00848042, Completed (2017)<br>NCT02680535, Completed (2021)<br>NCT04240639, Recruiting (2021)                                                                                                                                                                                                                                                                                                                                                                                                                                                                                                                                                                |
| AGulX                   | Polysiloxane core matrix bound to gadolinium chelate                                  | Theranostics against various cancers                                          | NCT02820454, Phase I, Completed (2019)<br>NCT03308604, Phase I/II, Recruiting (2021)<br>NCT04789486, Phase I/II, Recruiting (2021)<br>NCT04881032, Phase I/II, Recruiting (2021)<br>NCT04094077, Phase II, Terminated (2021)<br>NCT04899908, Phase II, Recruiting (2021)<br>NCT03818386, Phase II, Recruiting (2022)<br>NCT04784221, Phase II, Not recruiting yet (2022)                                                                                                                                                                                                                                                                                                                          |
| NU-0129                 | Gold NP conjugated with nucleic acids                                                 | Treatment of recurrent glioblastoma or gliosarcoma undergoing surgery         | NCT03020017, Phase I, Completed (2020)                                                                                                                                                                                                                                                                                                                                                                                                                                                                                                                                                                                                                                                            |
| NBTR3                   | Hafnium oxide NP                                                                      | Radiosensitizers for external-beam radiation therapy against multiple cancers | NCT01433068, Phase I, Completed (2020)<br>NCT04484909, Phase I, Recruiting (2020)<br>NCT01946867, Phase I, Recruiting (2021)<br>NCT02379845, Phase II/III, Completed (2021)<br>NCT02721056, Phase I/II, Terminated (2021)<br>NCT02805894, Phase I/II, Terminated (2021)<br>NCT04505267, Phase I, Recruiting (2021)<br>NCT04615013, Phase I, Recruiting (2021)<br>NCT04834349, Phase II, Recruiting (2021)<br>NCT04862455, Phase II, Recruiting (2021)<br>NCT02901483, Phase Ib/II, Terminated (2022)<br>NCT02465593, Phase Ib/II, Terminated (2022)<br>NCT03589339, Phase I, Recruiting (2022)<br>NCT04892173, Phase III, Recruiting (2022)<br>NCT05039632, Phase I/II, Not yet recruiting (2022) |
| <sup>89</sup> Zr-CPC634 | Polymeric NP radiolabeled with <sup>89</sup> Zr and loaded with docetaxel             | Treatment and imaging of ovarian cancer                                       | NCT03742713, Phase II, Completed (2020)                                                                                                                                                                                                                                                                                                                                                                                                                                                                                                                                                                                                                                                           |
| <sup>64</sup> Cu-Macrin | <sup>64</sup> Cu-labelled polyglucose NP                                              | PET imaging of macrophage at disease sites                                    | NCT04843891, Phase I, Recruiting (2021)                                                                                                                                                                                                                                                                                                                                                                                                                                                                                                                                                                                                                                                           |

|                                                                                                |                                                                                                                |                                     |                                                                                                                                 |
|------------------------------------------------------------------------------------------------|----------------------------------------------------------------------------------------------------------------|-------------------------------------|---------------------------------------------------------------------------------------------------------------------------------|
| Radiolabeled Cornell dots                                                                      | RGD-targeted Silica NP radiolabeled with <sup>124</sup> I or <sup>89</sup> Zr (in addition to NIR fluorophore) | Imaging of various cancers          | NCT01266096, Active (2021)<br>NCT03465618, Phase I, Recruiting (2022)                                                           |
| Cornell dots                                                                                   | RGD-targeted Silica NP labeled NIR fluorophore                                                                 | Imaging of head and neck melanoma   | NCT02106598, Phase I/II, Recruiting (2022)                                                                                      |
| Radiolabeled Cornell dots                                                                      | PSMA-targeted Silica NP radiolabeled with <sup>64</sup> Cu (in addition to NIR fluorophore)                    | Imaging of various cancers          | NCT04167969, Phase I, Recruiting (2022)                                                                                         |
| ONM-100                                                                                        | pH-sensitive micelle encapsulating a fluorophore                                                               | Intraoperative fluorescence imaging | NCT03735680, Phase II, Completed (2022)<br>NCT05048082, Phase II, Recruiting (2022)<br>NCT04950166, Phase II, Recruiting (2022) |
| * The year in the clinical trial row refers to the date when the clinical study was initiated. |                                                                                                                |                                     |                                                                                                                                 |
